# Supplementary material for: Identifying SARS-CoV-2 Drugs Binding to the Spike Fatty Acid Binding Pocket Using In Silico Docking and Molecular Dynamics
Source: MDPI journal article supplement (doi:10.3390/ijms24044192), 2023-02-20
Supplement: s1 [file s1]

# Identifying SARS-CoV-2 Drugs Binding to the Spike Fatty Acid Binding Pocket Using In Silico Docking and Molecular Dynamics

## Supplementary Material

Sakshi Piplani<sup>1-2\*</sup>, Puneet Singh<sup>1-2\*</sup>, Nikolai Petrovsky<sup>1-2#</sup> David A. Winkler<sup>3-5#</sup>

<sup>1</sup> College of Medicine and Public Health, Flinders University, Bedford Park 5046, Australia

<sup>2</sup> Vaxine Pty Ltd, 11 Walkley Avenue, Warradale 5046, Australia

<sup>3</sup> Department of Biochemistry and Genetics, La Trobe Institute for Molecular Science, La Trobe University, Melbourne, Victoria, 3086, Australia

<sup>4</sup> Monash Institute of Pharmaceutical Sciences, Monash University, Parkville 3052, Australia

<sup>5</sup> School of Pharmacy, University of Nottingham, Nottingham NG7 2RD. UK

\* joint first authors

# joint senior authors

## Supplementary Information

**Table S1.** MMPBSA binding energies (kcal/mol) of top 100 docking candidates. Physical properties computed by Cactvs 3.4.8.18

| Drug (logP N <sub>donor</sub> N <sub>acceptor</sub> N <sub>rot-bonds</sub> )                                                | ΔG     | Drug                                                                                                                                     | ΔG     | Drug                                                                                                                         | ΔG     | Drug                                                                                                                     | ΔG    |
|-----------------------------------------------------------------------------------------------------------------------------|--------|------------------------------------------------------------------------------------------------------------------------------------------|--------|------------------------------------------------------------------------------------------------------------------------------|--------|--------------------------------------------------------------------------------------------------------------------------|-------|
| <br><b>Caprospinol</b> 8.2 0 4 6           | -38.89 | <br><b>5-α-pregnane-3-β-ol hemisuccinate</b> 4.9 1 5 6 | -29.60 | <br><b>Pregnenolone acetate</b> 4.8 0 3 3 | -27.75 | <br><b>Telmisartan</b> 6.9 1 4 7      | -     |
| <br><b>Indacaterol</b> 3.3 4 4 6           | -35.99 | <br><b>Metixene</b> 4.9 0 2 2                          | -29.50 | <br><b>Altrenogest</b> 2.8 1 2 2          | -27.58 | <br><b>Sonidegib</b> 5.8 1 8 5        | 23.88 |
| <br><b>Golvatinib</b> 4.1 3 9 8            | -35.37 | <br><b>β-Naphthoflavone</b> 4.4 0 2 1                  | -29.32 | <br><b>Radiprodil</b> 3.0 2 5 3           | -27.40 | <br><b>Mapracorat</b> 6.2 2 8 6       | -     |
| <br><b>Setiptiline</b> 3.3 0 1 0           | -35.04 | <br><b>Irinotecan</b> 3.0 1 8 5                       | -29.24 | <br><b>Ocaperidone</b> 3.3 0 6 4         | -27.36 | <br><b>Zanafezil</b> 4.9 1 3 6       | 23.29 |
| <br><b>Oxabolone cypionate</b> 5.7 1 4 5 | -34.78 | <br><b>Revefenacin</b> 4.1 2 6 11                    | -29.16 | <br><b>Regorafenib</b> 4.2 3 8 5        | -27.31 | <br><b>Flufenoxuron</b> 6.3 2 9 4   | -     |
| <br><b>Lurasidone</b> 5.4 0 6 5          | -33.04 | <br><b>Hydroxycortisone (Cetacort)</b> 1.6 3 5 2     | -29.16 | <br><b>Cortisone acetate</b> 2.1 1 6 4  | -27.16 | <br><b>p-quaterphenyl</b> 7.3 0 0 3 | 22.62 |

| Drug (logP N <sub>donor</sub> N <sub>acceptor</sub> N <sub>rot-bonds</sub> )                                                  | ΔG     | Drug                                                                                                                      | ΔG     | Drug                                                                                                                        | ΔG     | Drug                                                                                                                | ΔG    |
|-------------------------------------------------------------------------------------------------------------------------------|--------|---------------------------------------------------------------------------------------------------------------------------|--------|-----------------------------------------------------------------------------------------------------------------------------|--------|---------------------------------------------------------------------------------------------------------------------|-------|
| 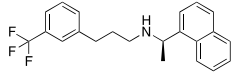<br><b>Cinacalcet</b> 6.1 1 4 6              | -33.02 | <br><b>Implipitape</b> 7.3 2 3 8        | -29.11 | <br><b>Tezacafort</b> 2.9 4 9 8          | -26.85 | <br><b>Fedovapagon</b> 3.2 1 3 4 | 22.44 |
| <br><b>Brequinar</b> 5.6 1 5 3               | -32.94 | <br><b>Betulin</b> 8.3 2 2 2            | -28.83 | <br><b>Ouabain</b> -1.7 8 12 4           | -26.83 | <br><b>Lumacaftor</b> 4.4 2 8 5  | 22.33 |
| <br><b>Estradiol cypionate</b> 7.1 1 3 5     | -32.94 | <br><b>Dehydrocholic acid</b> 2.6 1 5 4 | -28.82 | <br><b>Doxazosin</b> 2.5 1 9 4           | -26.59 | <br><b>Tarazepide</b> 4.6 1 3 3  | 21.94 |
| <br><b>Segesterone</b> 2.3 1 3 1             | -32.80 | <br><b>Tecarfarin</b> 5.5 1 11 5        | -28.80 | <br><b>Paliroden</b> 6.6 0 4 5           | -26.56 | <br><b>Xaliproden</b> 6.2 0 4 4  | 21.92 |
| <br><b>Tipranavir</b> 7.0 2 10 11            | -32.39 | <br><b>Talniflumate</b> 5.3 1 9 5       | -28.56 | <br><b>Mepron (atovaquone)</b> 5.2 1 3 2 | -26.35 | <br><b>Manidipine</b> 5.6 1 9 11 | 21.63 |
| <br><b>Nandrolone decanoate</b> 7.3 0 3 10 | -32.33 | <br><b>Gliquidone</b> 4.6 2 6 7       | -28.54 | <br><b>Aripiprazole</b> 4.6 1 4 7      | -25.96 | <br><b>Ponatinib</b> 4.1 1 8 6 | 21.19 |
| <br><b>Arotinoid acid</b> 7.5 1 2 3        | -32.05 | <br><b>Androstanedione</b> 3.6 0 2 0  | -28.54 | <br><b>Bifeprunox</b> 4.2 1 4 4        | 21.16  |                                                                                                                     |       |

| Drug (logP $N_{\text{donor}}$ $N_{\text{acceptor}}$ $N_{\text{rot-bonds}}$ )                                                    | $\Delta G$ | Drug                                                                                                                                 | $\Delta G$ | Drug                                                                                                                   | $\Delta G$ | Drug                                                                                                                     | $\Delta G$ |
|---------------------------------------------------------------------------------------------------------------------------------|------------|--------------------------------------------------------------------------------------------------------------------------------------|------------|------------------------------------------------------------------------------------------------------------------------|------------|--------------------------------------------------------------------------------------------------------------------------|------------|
| 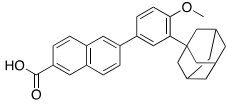<br><b>Adapalene</b> 7.7 1 3 4                 | -32.03     | <br><b>Troglitazone</b> 5.1 2 6 5                  | -28.53     | <br><b>Antrafenine</b> 7.5 1 12 8   | -25.86     | <br><b>Mubritinib</b> 5.4 0 8 10      | 20.81      |
| <br><b>Flavoxate</b> 4.3 0 5 6                 | -31.70     | <br><b>Inecalcitol</b> 4.4 3 3 4                   | -28.26     | <br><b>Cabozantinib</b> 5.4 2 7 8   | -25.81     | <br><b>Elacridar</b> 5.6 2 7 8        | 20.28      |
| <br><b>Nandrolone phenpropionate</b> 5.1 0 3 5 | -31.52     | <br><b><math>\beta</math>-carotene</b> 13.5 0 0 10 | -28.26     | <br><b>Netoglitazone</b> 4.9 1 5 5  | -25.53     | <br><b>Tocotrienol</b> 8.2 1 2 9      | 20.11      |
| <br><b>Calcitriol</b> 5.1 3 3 6                | -31.06     | <br><b>Reglitazar</b> 4.0 1 6 7                    | -28.25     | <br><b>Etiocolanolone</b> 3.7 1 2 0 | -25.44     | <br><b>Imiglitazar</b> 5.1 1 7 11     | 20.09      |
| <br><b>Cholesteryl linoleate</b> 15.9 0 2 21  | -30.98     | <br><b>Lidoflazine</b> 6.0 1 5 9                  | -28.11     | <br><b>Dotarizine</b> 4.9 0 4 8    | -25.16     | <br><b>Difenpiramide</b> 3.8 1 2 4   | 19.56      |
| <br><b>Pranlukast</b> 4.2 2 7 9              | -30.79     | <br><b>Desonide</b> 2.7 2 6 2                    | -28.08     | <br><b>Mosapramine</b> 5.4 1 4 4  | -24.87     | <br><b>1-Testosterone</b> 4.0 1 2 0 | 19.31      |
| <br><b>Vibegron</b> 1.8 3 5 6                | -30.72     | <br><b>Sorafenib</b> 4.1 3 7 5                   | -28.04     | <br><b>Mosapramine</b> 5.4 1 4 4  | -24.73     | <br><b>1-Testosterone</b> 4.0 1 2 0 | 18.99      |

| Drug (logP $N_{\text{donor}}$ $N_{\text{acceptor}}$ $N_{\text{rot-bonds}}$ )        | $\Delta G$ | Drug                                                                                 | $\Delta G$ | Drug                                                                                 | $\Delta G$ | Drug                                                                                 | $\Delta G$ |
|-------------------------------------------------------------------------------------|------------|--------------------------------------------------------------------------------------|------------|--------------------------------------------------------------------------------------|------------|--------------------------------------------------------------------------------------|------------|
| 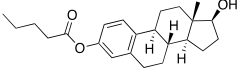   | -30.60     |    | -27.98     |   | -24.72     |   | -          |
| <b>Estradiol valerate</b> 6.0 1 3 5                                                 | -30.60     | <b>Menatetrenone</b> 8.9 0 2 11                                                      | -27.98     | <b>Laniquidar</b> 5.8 0 6 8                                                          | -24.72     | <b>Tecovirimat</b> 2.6 1 6 1                                                         | 17.77      |
|    | -30.58     |    | -27.95     |   | -24.67     |   | -          |
| <b>Siponimod</b> 4.8 1 8 9                                                          | -30.58     | <b>Clobetasol propionate</b> 3.8 1 6 5                                               | -27.95     | <b>Penfluridol</b> 7.3 1 7 7                                                         | -24.67     | <b>Emicerfont</b> 2.9 1 5 4                                                          | 17.57      |
|    | -30.11     |    | -27.78     |   | -24.05     |   | -          |
| <b>(S)-famoxadone</b> 5.0 1 5 5                                                     | -30.11     | <b>Bifenthrin</b> 6.0 0 5 6                                                          | -27.78     | <b>Risdiplam</b> 0.5 1 6 2                                                           | -24.05     | <b>Grapiprant</b> 4.6 2 5 7                                                          | 17.33      |
|    | -29.87     |    | -27.75     |   | -24.03     |   | -          |
| <b>Estradiol benzoate</b> 4.5 1 3 3                                                 | -29.87     | <b>Englitazone</b> 4.4 1 4 4                                                         | -27.75     | <b>Nilotinib</b> 4.9 2 9 6                                                           | -24.03     | <b>Lorpiprazole</b> 3.3 0 7 4                                                        | 15.96      |
|  | -29.75     |  | -27.75     |  | -23.95     |  | -          |
| <b>Ethynodiol diacetate</b> 3.9 0 4 5                                               | -29.75     | <b>Pregnenolone acetate</b> 4.8 0 3 3                                                | -27.75     | <b>Fluspirilene</b> 5.6 1 5 7                                                        | -23.95     | <b>Mardepodect</b> 4.2 0 4 5                                                         | 15.31      |

**Table S2.** Correlations between physical properties of ligands and binding energies

|                       | logP  | N <sub>donor</sub> | N <sub>acceptor</sub> | N <sub>rotate</sub> | $\Delta G$ |
|-----------------------|-------|--------------------|-----------------------|---------------------|------------|
| logP                  | 1.00  |                    |                       |                     |            |
| N <sub>donor</sub>    | -0.38 | 1.00               |                       |                     |            |
| N <sub>acceptor</sub> | -0.29 | 0.41               | 1.00                  |                     |            |
| N <sub>rotate</sub>   | 0.57  | 0.02               | 0.23                  | 1.00                |            |
| $\Delta G$            | -0.14 | -0.08              | 0.12                  | -0.04               | 1.00       |
